# Supplementary material for: Rapid measurement of total lipids in zooplankton using the sulfo-phospho-vanillin reaction
Source: Royal Society of Chemistry journal article supplement (doi:10.1039/d2ay00665k), 2022-01-01
Supplement: d2ay00665k1.pdf [file d2ay00665k1.pdf]

Supporting Information. **Table S1.**

Abbreviations: SE/WE = Steryl/Wax Esters. TAG = Triacylglycerols. FFA = Free Fatty Acids

ST/Alc = Sterols/ Fatty Alcohols

|     | Zooplankton Taxa               | Total Lipid ( % of WWT) |      |         | % Lipid Class Composition (Iatroscan) |      |      |        |       |
|-----|--------------------------------|-------------------------|------|---------|---------------------------------------|------|------|--------|-------|
|     |                                | SPV                     | Grav | TLC_FID | SE/WE                                 | TAG  | FFA  | ST/Alc | Polar |
| C1  | <i>N. flemingeri/plumchrus</i> | 13.7                    | 12.2 | 13.6    | 93.8                                  | 2.2  | 2.6  | 0.3    | 1.1   |
| C2  | <i>N. flemingeri/plumchrus</i> | 9.9                     | 11.0 | 12.3    | 93.8                                  | 1.1  | 1.7  | 0.4    | 3.1   |
| C3  | <i>N. flemingeri/plumchrus</i> | 18.2                    | 19.3 | 21.7    | 93.1                                  | 3.2  | 1.4  | 0.1    | 2.2   |
| C4  | <i>N. flemingeri/plumchrus</i> | 30.4                    | 32.4 | 36.3    | 86.7                                  | 7.1  | 2.3  | 0.3    | 3.6   |
| C5  | <i>N. flemingeri/plumchrus</i> | 19.4                    | 18.5 | 20.7    | 92.9                                  | 2.5  | 1.6  | 0.2    | 2.7   |
| C6  | <i>N. flemingeri/plumchrus</i> | 23.7                    | 24.3 | 27.3    | 85.0                                  | 9.2  | 2.3  | 0.6    | 3.0   |
| C7  | <i>N. cristatus</i>            | 7.3                     | 6.9  | 7.8     | 86.1                                  | 4.3  | 4.5  | 0.8    | 4.3   |
| C8  | <i>N. cristatus</i>            | 2.9                     | 2.2  | 2.5     | 87.6                                  | 3.3  | 3.9  | 0.3    | 4.9   |
| C9  | <i>N. flemingeri/plumchrus</i> | 20.3                    | 19.1 | 21.3    | 94.5                                  | 3.2  | 0.8  | 0.0    | 1.5   |
| E1  | Mixed Euphausiid               | 4.2                     | 4.3  | 3.9     | 38.9                                  | 6.1  | 16.7 | 2.2    | 36.0  |
| E2  | Mixed Euphausiid               | 15.1                    | 12.8 | 11.8    | 40.2                                  | 11.9 | 2.1  | 0.7    | 45.1  |
| E3  | Mixed Euphausiid               | 11.0                    | 9.3  | 8.5     | 38.0                                  | 13.3 | 0.4  | 1.0    | 47.2  |
| E4  | Mixed Euphausiid               | 5.5                     | 4.7  | 4.2     | 39.2                                  | 12.0 | 5.8  | 1.4    | 41.6  |
| E5  | Euphausiid                     | 5.5                     | 5.8  | 5.2     | 10.0                                  | 39.9 | 5.4  | 1.9    | 42.8  |
| E6  | Euphausiid                     | 2.9                     | 2.8  | 2.5     | 4.0                                   | 49.1 | 2.4  | 0.8    | 43.8  |
| E7  | <i>T. inermis</i>              | 7.4                     | 8.3  | 7.6     | 42.1                                  | 6.7  | 9.7  | 1.3    | 40.2  |
| E8  | <i>T. raschi</i>               | 2.0                     | 2.5  | 2.3     | 3.4                                   | 28.4 | 17.6 | 2.3    | 48.2  |
| E9  | <i>T. raschi</i>               | 5.3                     | 5.0  | 4.6     | 16.0                                  | 26.4 | 10.6 | 1.6    | 45.4  |
| E10 | <i>E. pacifica</i>             | 5.3                     | 5.6  | 4.0     | X                                     | 41.3 | 2.8  | 3.3    | 52.6  |

|     |                                |       |       |      |      |      |     |     |      |
|-----|--------------------------------|-------|-------|------|------|------|-----|-----|------|
| E11 | <i>E. pacifica</i>             | 4.6   | 5.3   | 5.5  | X    | 48.4 | 5.7 | 4.1 | 41.8 |
| E12 | <i>E. pacifica</i>             | 5.7   | 6.5   | 4.6  | X    | 43.5 | 4.5 | 3.8 | 48.1 |
| E13 | <i>E. pacifica</i>             | 4.0   | 4.5   | 3.9  | X    | 45.9 | 3.7 | 4.4 | 46.0 |
| E14 | <i>E. pacifica</i>             | 6.3   | 7.5   | 6.2  | X    | 45.0 | 4.9 | 3.3 | 46.8 |
| E15 | <i>E. pacifica</i>             | 7.3   | 8.3   | 5.8  | X    | 44.9 | 5.1 | 3.2 | 46.9 |
| E16 | <i>E. pacifica</i>             | 6.8   | 7.3   | 5.9  | X    | 45.6 | 7.1 | 3.5 | 43.8 |
| E17 | <i>E. pacifica</i>             | 4.7   | 5.0   | 4.0  | X    | 42.2 | 7.1 | 4.5 | 46.2 |
| E18 | <i>E. pacifica</i>             | 4.6   | 5.6   | 4.1  | X    | 45.7 | 4.9 | 4.2 | 45.2 |
| E19 | <i>E. pacifica</i>             | 6.1   | 6.4   | 5.5  | X    | 49.9 | 4.5 | 4.7 | 40.9 |
| C10 | <i>N. flemingeri/plumchrus</i> | 47.6  | 52.32 | 45.9 | 91.0 | 4.1  | 2.0 | 0.2 | 2.6  |
| C11 | <i>C. marshallae/glacialis</i> | 11.3  | 10.59 | 7.1  | 88.6 | 5.4  | 0.0 | 0.9 | 5.1  |
| C12 | <i>N. cristatus</i>            | 7.80  | 8.02  | 6.1  | 90.6 | 2.8  | 3.0 | 0.4 | 3.2  |
| C13 | <i>C. marshallae/glacialis</i> | 9.60  | 9.36  | 7.7  | 74.6 | 3.0  | 0.0 | 1.2 | 21.2 |
| C14 | <i>N. flemingeri/plumchrus</i> | 11.8  | 12.29 | 9.6  | 90.2 | 1.7  | 1.6 | 0.3 | 6.2  |
| C15 | <i>C. marshallae/glacialis</i> | 10.47 | 9.53  | 10.2 | 90.0 | 4.0  | 0.0 | 0.1 | 5.9  |
| C16 | <i>C. marshallae/glacialis</i> | 14.94 | 14.27 | 10.1 | 77.1 | 3.5  | 0.2 | 1.4 | 17.8 |
| C17 | <i>C. marshallae/glacialis</i> | 10.09 | 8.82  | 10.9 | 55.0 | 0.6  | 0.0 | 2.3 | 42.1 |
| C18 | <i>N. flemingeri/plumchrus</i> | 41.86 | 43.47 | 44.3 | 88.8 | 5.0  | 1.3 | 0.2 | 4.6  |

|     |                          |       |      |     |      |      |      |     |      |
|-----|--------------------------|-------|------|-----|------|------|------|-----|------|
| C19 | <i>N. cristatus</i>      | 7.26  | 7.48 | 6.7 | 86.8 | 4.9  | 4.9  | 0.4 | 3.0  |
| E20 | <i>Mixed Euphausiids</i> | 4.46  | 3.25 | 2.5 | 9.5  | 13.1 | 25.2 | 4.3 | 47.9 |
| E21 | <i>Mixed Euphausiids</i> | 6.28  | 4.94 | 3.6 | 18.7 | 16.5 | 22.4 | 2.6 | 39.8 |
| E22 | <i>T. raschi</i>         | 10.35 | 9.57 | 8.5 | 4.3  | 52.0 | 6.8  | 1.6 | 35.3 |
| E23 | <i>T. inermis</i>        | 8.72  | 6.63 | 6.1 | 31.8 | 9.6  | 13.8 | 2.3 | 42.4 |
| E24 | <i>T. inermis</i>        | 11.83 | 8.52 | 6.6 | 37.2 | 10.2 | 10.3 | 1.9 | 40.2 |
| E25 | <i>T. inermis</i>        | 10.96 | 7.83 | 6.1 | 36.6 | 9.5  | 11.4 | 1.8 | 40.7 |
| E26 | <i>T. raschi</i>         | 5.79  | 5.73 | 5.0 | 4.8  | 39.5 | 14.6 | 2.6 | 38.5 |
| E27 | <i>T. raschi</i>         | 6.28  | 5.99 | 5.5 | 7.5  | 37.8 | 14.3 | 2.1 | 38.2 |
| E28 | <i>T. raschi</i>         | 4.19  | 4.25 | 2.8 | 3.6  | 25.7 | 22.2 | 2.8 | 45.8 |
| E29 | <i>T. raschi</i>         | 6.16  | 6.04 | 4.1 | 8.1  | 25.0 | 16.5 | 2.6 | 47.8 |
